# Supplementary material for: Within-host Evolution of Segments Ratio for the Tripartite Genome of Alfalfa Mosaic Virus
Source: PubMed Central journal article supplement (PMC5504059; doi:10.1038/s41598-017-05335-8), 2017-07-10
Supplement: 41598_2017_5335_MOESM1_ESM.pdf [file 41598_2017_5335_MOESM1_ESM.pdf]

**Within-host Evolution of Segments Ratio for the Tripartite Genome of**  
*Alfalfa Mosaic Virus*

Beilei Wu, Mark P. Zwart, Jesús A. Sánchez-Navarro & Santiago F. Elena

**Supplementary Table S1. Primers used to amplify each RNA segment.**

| <b>RNA</b> | <b>Primers name and sense</b> | <b>Range</b> | <b>Sequence (5'→3')</b> |
|------------|-------------------------------|--------------|-------------------------|
| RNA1       | 2796sAMVRNA1 forward          | 1300-1319    | CGGTGGTGTGACTCTGATTT    |
|            | 2797AsAMVRNA1 reverse         | 1391-1412    | CTCCCTTGTCTAGGAGGGATAA  |
| RNA2       | 2798sAMVRNA2 forward          | 664-685      | GAGGAACTTGGACCTCTGAATG  |
|            | 2799AsAMVRNA2 reverse         | 727-748      | TGTCGAGTGGCTTAGCATTATC  |
| RNA3       | 2800sAMVRNA3 forward          | 606-625      | CGTCCATCACTCGGCTATTT    |
|            | 2801AsAMVRNA3 reverse         | 685-705      | TCGGTGTCAACATCCACTAAC   |
